# Supplementary material
Source: PubMed Central journal article supplement (PMC6668688)
Supplement: jci-129-122936-s050.pdf [file jci-129-122936-s050.pdf]

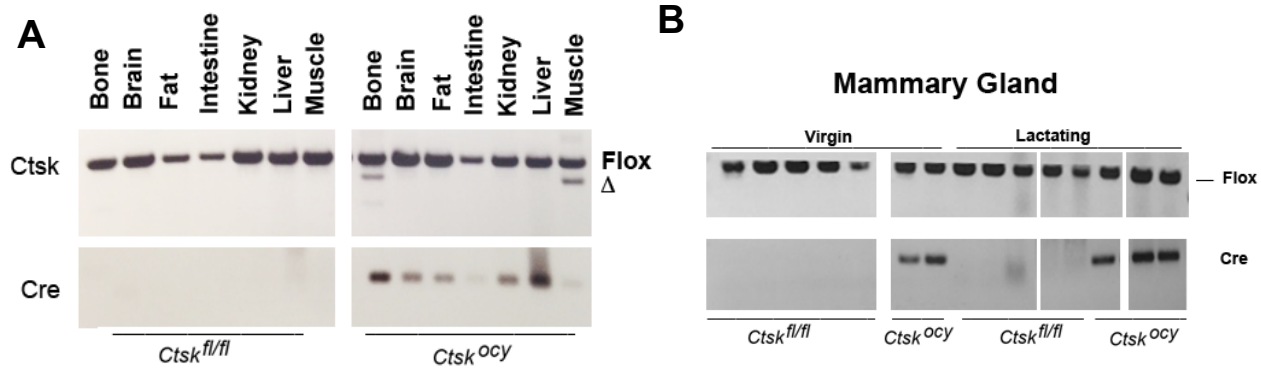

**Figure S1. Conditional Inactivation of *Ctsk* using *Dmp1Cre*.** A) Photographs of PCR amplicons derived from mouse genomic DNA isolated from a variety of tissues of *Ctsk<sup>fl/fl</sup>* and *Ctsk<sup>ocy</sup>* mice. B) Photographs of PCR amplicons derived from mouse genomic DNA isolated from the mammary gland of *Ctsk<sup>fl/fl</sup>* and *Ctsk<sup>ocy</sup>* mice.

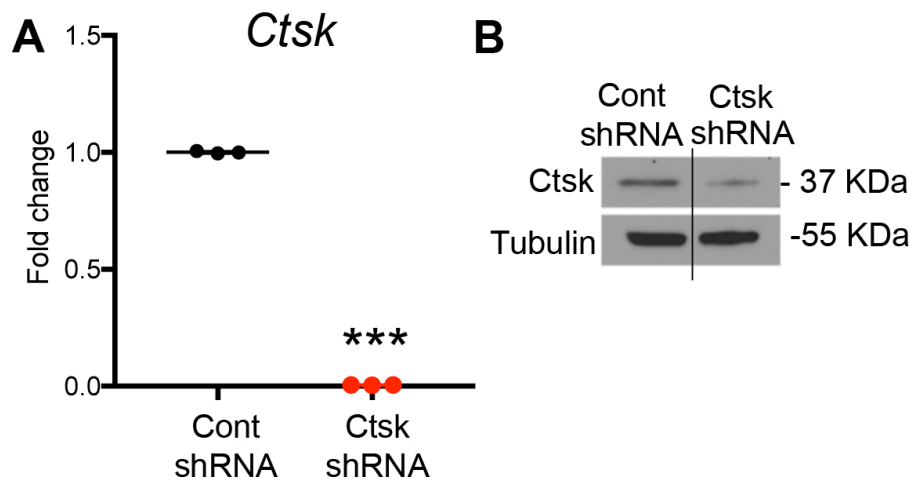

**Figure S2. *Ctsk* silencing in Ocy454 cells.** **A)** Efficiency of *Ctsk* deletion in Ocy454 cells. Control shRNA (black circles) and *Ctsk* shRNA (open circles) (TRCN0000030591). Data shown are means of triplicates  $\pm$  SEM normalized to expression of 18S mRNA  $*=p < 0.05$ , (n=3). **B)** Densitometric analysis of Western blot analysis showing efficiency of *Ctsk* silencing. Beta-tubulin is shown as a loading control, (n=3).  $***=p < 0.001$  compared to control shRNA Ocy454 cells.

Table S1.  $\mu$ CT analysis of virgin and lactating *Ctsk<sup>Ocy</sup>* mice and their control littermates

| Parameters                               | Virgin                               |                                    | Lactating                            |                                    | Two-way ANOVA |           |             |
|------------------------------------------|--------------------------------------|------------------------------------|--------------------------------------|------------------------------------|---------------|-----------|-------------|
|                                          | <i>Ctsk<sup>fl/fl</sup></i><br>(n=9) | <i>Ctsk<sup>Ocy</sup></i><br>(n=9) | <i>Ctsk<sup>fl/fl</sup></i><br>(n=7) | <i>Ctsk<sup>Ocy</sup></i><br>(n=7) | Deletion      | Lactation | Interaction |
| <b><u>Cortical Bone</u></b>              |                                      |                                    |                                      |                                    |               |           |             |
| Cross-sectional volume(mm <sup>3</sup> ) | 1.15±0.02                            | 1.14±0.02                          | 1.13±0.03                            | 1.15±0.02                          | NS            | NS        | NS          |
| Cortical volume (mm <sup>3</sup> )       | 0.478±0.008                          | 0.477±0.010                        | 0.418±0.013 <sup>†‡</sup>            | 0.468±0.017 <sup>#</sup>           | NS            | 0.0064    | 0.0382      |
| Marrow volume (mm <sup>3</sup> )         | 0.672±0.011                          | 0.666±0.010                        | 0.709±0.018                          | 0.684±0.026                        | NS            | NS        | NS          |
| Cortical thickness (mm)                  | 0.180±0.002                          | 0.181±0.003                        | 0.155±0.003 <sup>†‡</sup>            | 0.172±0.007 <sup>#</sup>           | NS            | 0.0001    | 0.0417      |
| <b><u>Cancellous Bone</u></b>            |                                      |                                    |                                      |                                    |               |           |             |
| BV/TV (%)                                | 6.6±0.37                             | 6.0±0.45                           | 4.98±0.25 <sup>†</sup>               | 6.5±0.31 <sup>#</sup>              | NS            | NS        | 0.0085      |
| Tb.Th (mm)                               | 0.041±0.001                          | 0.040±0.001                        | 0.033±0.001 <sup>†‡</sup>            | 0.035±0.001 <sup>†‡</sup>          | NS            | 0         | NS          |
| Tb.N (/mm)                               | 3.38±0.12                            | 3.29±0.10                          | 3.30±0.09                            | 3.40±0.06                          | NS            | NS        | NS          |
| Tb.Sp (mm)                               | 0.297±0.011                          | 0.303±0.010                        | 0.304±0.009                          | 0.294±0.005                        | NS            | NS        | NS          |
| Conn.D (/mm <sup>3</sup> )               | 107±9                                | 90±9                               | 114±7                                | 146±6 <sup>†‡#</sup>               | NS            | 0.0008    | 0.008       |
| SMI (-)                                  | 2.72±0.06                            | 2.80±0.08                          | 2.64±0.05                            | 2.36±0.07 <sup>†‡#</sup>           | NS            | 0.0007    | 0.0137      |

<sup>†</sup>*p*<0.05 compared to virgin *Ctsk<sup>fl/fl</sup>*, Two-way ANOVA followed by Fisher's PLSD

<sup>‡</sup>*p*<0.05 compared to virgin *Ctsk<sup>Ocy</sup>*

<sup>#</sup>*p*<0.05 compared to lactating *Ctsk<sup>fl/fl</sup>*

Table S2. Histomorphometric analysis of virgin and lactating *Ctsk<sup>Ocy</sup>* mice and their control littermates

| Parameters                                      | Virgin                               |                                    | Lactating                              |                                    | Two-way ANOVA |           |             |
|-------------------------------------------------|--------------------------------------|------------------------------------|----------------------------------------|------------------------------------|---------------|-----------|-------------|
|                                                 | <i>Ctsk<sup>fl/fl</sup></i><br>(n=9) | <i>Ctsk<sup>Ocy</sup></i><br>(n=9) | <i>Ctsk<sup>fl/fl</sup></i><br>(n=6-7) | <i>Ctsk<sup>Ocy</sup></i><br>(n=6) | Deletion      | Lactation | Interaction |
| BV/TV (%)                                       | 5.97±0.54                            | 5.16±0.44                          | 4.02±0.23 <sup>†</sup>                 | 5.52±0.40 <sup>#</sup>             | NS            | NS        | 0.0161      |
| Tb.Th (µm)                                      | 30.82±0.92                           | 29.63±0.86                         | 24.56±0.67 <sup>†‡</sup>               | 27.94±0.81 <sup>†#</sup>           | NS            | 0.0001    | 0.0163      |
| Tb.N (/mm)                                      | 1.92±0.15                            | 1.73±0.13                          | 1.64±0.08                              | 1.98±0.13                          | NS            | NS        | NS          |
| Tb.Sp (µm)                                      | 518±49                               | 574±47                             | 597±31                                 | 489±32                             | NS            | NS        | NS          |
| MS/BS (%)                                       | 36.02±1.30                           | 33.66±1.09                         | 29.72±1.47 <sup>†‡</sup>               | 35.03±1.11 <sup>#</sup>            | NS            | NS        | 0.0061      |
| MAR (µm/day)                                    | 1.80±0.11                            | 1.99±0.10                          | 1.82±0.12                              | 1.87±0.10                          | NS            | NS        | NS          |
| BFR/BS (µm <sup>3</sup> /µm <sup>2</sup> /year) | 234±13                               | 243±10                             | 197±15                                 | 239±13                             | NS            | NS        | NS          |
| BFR/BV (%/year)                                 | 1570±70                              | 1774±115                           | 1629±117                               | 1731±92                            | NS            | NS        | NS          |
| Ob.S/BS (%)                                     | 21.75±1.85                           | 18.51±0.96                         | 16.07±1.11                             | 20.74±2.39                         | NS            | NS        | 0.0219      |
| N.Ob/B.Pm (/mm)                                 | 17.82±1.61                           | 14.85±1.05                         | 14.06±1.10                             | 18.15±2.47                         | NS            | NS        | 0.0327      |
| OS/BS (%)                                       | 11.14±2.81                           | 6.29±1.35                          | 9.96±1.61                              | 10.00±3.06                         | NS            | NS        | NS          |
| O.Th (µm)                                       | 2.37±0.21                            | 2.24±0.14                          | 2.24±0.16                              | 2.81±0.20 <sup>‡#</sup>            | NS            | NS        | NS          |
| Oc.S/BS (%)                                     | 7.60±1.35                            | 7.49±1.25                          | 10.77±1.18 <sup>†‡</sup>               | 6.88±0.31 <sup>#</sup>             | 0.037         | NS        | NS          |
| N.Oc/B.Pm (/mm)                                 | 3.76±0.56                            | 3.56±0.53                          | 4.62±0.55                              | 2.88±0.23 <sup>#</sup>             | 0.0451        | NS        | NS          |

<sup>†</sup>*p*<0.05 compared to virgin *Ctsk<sup>fl/fl</sup>*, Two-way ANOVA followed by Fisher's PLSD

<sup>‡</sup>*p*<0.05 compared to virgin *Ctsk<sup>Ocy</sup>*

<sup>#</sup>*p*<0.05 compared to lactating *Ctsk<sup>fl/fl</sup>*

Table S3.  $\mu$ CT analysis of 12-wk-old *Ctsk<sup>Ocy</sup>* male mice and their control littermates

| Parameters                                   | <i>Ctsk<sup>fl/fl</sup></i><br>(n=9) | <i>Ctsk<sup>Ocy</sup></i><br>(n=8) |
|----------------------------------------------|--------------------------------------|------------------------------------|
| <b><u>Cortical Bone (midshaft femur)</u></b> |                                      |                                    |
| Cross-sectional volume (mm <sup>3</sup> )    | 1.21±0.05                            | 1.24±0.03                          |
| Cortical volume (mm <sup>3</sup> )           | 0.522±0.017                          | 0.537±0.009                        |
| Marrow volume (mm <sup>3</sup> )             | 0.688±0.032                          | 0.706±0.027                        |
| Cortical thickness (mm)                      | 0.186±0.003                          | 0.192±0.002                        |
| <b><u>Cancellous Bone (distal femur)</u></b> |                                      |                                    |
| BV/TV (-)                                    | 0.099±0.005                          | 0.103±0.003                        |
| Tb.Th (mm)                                   | 0.036±0.000                          | 0.039±0.001*                       |
| Tb.N (/mm)                                   | 4.60±0.09                            | 4.51±0.10                          |
| Tb.Sp (mm)                                   | 0.210±0.004                          | 0.214±0.005                        |
| Conn.D (/mm <sup>3</sup> )                   | 199±13                               | 193±14                             |
| SMI (-)                                      | 2.21±0.08                            | 2.24±0.06                          |

\* $p < 0.05$  compared to *Ctsk<sup>fl/fl</sup>*, unpaired t-test

Table S4. Osteocyte lacunar analysis of virgin and lactating *Ctsk<sup>Ocy</sup>* mice and their control littermates

| Parameters                                        | Virgin                               |                                    | Lactating                            |                                    | Two-way ANOVA |           |             |
|---------------------------------------------------|--------------------------------------|------------------------------------|--------------------------------------|------------------------------------|---------------|-----------|-------------|
|                                                   | <i>Ctsk<sup>fl/fl</sup></i><br>(n=6) | <i>Ctsk<sup>Ocy</sup></i><br>(n=5) | <i>Ctsk<sup>fl/fl</sup></i><br>(n=7) | <i>Ctsk<sup>Ocy</sup></i><br>(n=6) | Deletion      | Lactation | Interaction |
| Bone volume (x10 <sup>4</sup> μm <sup>3</sup> )   | 12.86±0.64                           | 13.40±0.43                         | 11.19±0.36 <sup>†‡</sup>             | 12.54±0.29 <sup>#</sup>            | 0.0437        | 0.0093    | NS          |
| Single Ocy lacunar area (μm <sup>2</sup> )        | 23.28±1.32                           | 24.76±1.66                         | 31.23±1.31 <sup>†‡</sup>             | 23.69±2.37 <sup>#</sup>            | NS            | 0.0376    | 0.0155      |
| Total Ocy lacunar area (μm <sup>2</sup> )         | 1449±155                             | 1543±148                           | 2242±106 <sup>†‡</sup>               | 1484±177 <sup>#</sup>              | 0.0221        | 0.0131    | 0.0088      |
| Ocy lacunar perimeter (μm)                        | 19.91±0.71                           | 20.12±0.76                         | 23.15±0.40 <sup>†‡</sup>             | 20.34±0.98 <sup>#</sup>            | NS            | 0.0187    | 0.0476      |
| Ocy number                                        | 63.67±4.05                           | 64.00±4.69                         | 72.86±3.20                           | 62.17±2.06                         | NS            | NS        | NS          |
| Ocy density (x10 <sup>-4</sup> /μm <sup>3</sup> ) | 4.99±0.38                            | 4.78±0.35                          | 6.54±0.31 <sup>†‡</sup>              | 4.97±0.18 <sup>#</sup>             | 0.0073        | 0.0092    | 0.0423      |

<sup>†</sup>*p*<0.05 compared to virgin *Ctsk<sup>fl/fl</sup>*, Two-way ANOVA followed by Fisher's PLSD

<sup>‡</sup>*p*<0.05 compared to virgin *Ctsk<sup>Ocy</sup>*

<sup>#</sup>*p*<0.05 compared to lactating *Ctsk<sup>fl/fl</sup>*

Ocy density: Ocy number/bone volume

Table S5. Serum, plasma, and urinary markers

| Parameters                       | Virgin                                 |                                      | Lactating                              |                                      | Two-way ANOVA |           |             |
|----------------------------------|----------------------------------------|--------------------------------------|----------------------------------------|--------------------------------------|---------------|-----------|-------------|
|                                  | <i>Ctsk<sup>fl/fl</sup></i><br>(n=5-9) | <i>Ctsk<sup>Ocy</sup></i><br>(n=5-9) | <i>Ctsk<sup>fl/fl</sup></i><br>(n=5-9) | <i>Ctsk<sup>Ocy</sup></i><br>(n=5-9) | Deletion      | Lactation | Interaction |
| PTH (pg/ml)                      | 108.37±31.1                            | 94.2±35                              | 70.14±12 <sup>†</sup>                  | 106.14±40.5                          | NS            | NS        | 0.05        |
| PTHrP (pM)                       | 1.3±0.13                               | 1.48±0.11                            | 1.95±0.23 <sup>†</sup>                 | 1.6±0.18                             | NS            | <0.05     | NS          |
| 1,25(OH) <sub>2</sub> D (pmol/L) | 104.1±52.2                             | 113.54±51.7                          | 776.7±199 <sup>†‡</sup>                | 1029±227 <sup>†‡#</sup>              | NS            | <0.001    | NS          |
| CTX-1 (ng/ml)                    | 21.12±3.24                             | 23.16±3                              | 28.1±6 <sup>†</sup>                    | 25.2±3.3                             | NS            | <0.05     | NS          |
| P1NP (ng/ml)                     | 6.7±1.9                                | 5.3±2.1                              | 5.1±2                                  | 7.15±3.4                             | NS            | NS        | NS          |
| Serum Ca(mg/dl)                  | 7.86±0.088                             | 7.65±0.18                            | 7.95±0.16                              | 8.09±0.18                            | NS            | NS        | NS          |
| Milk Ca(mg/mg protein)           | -----                                  | -----                                | 2.19±0.15                              | 2.28±0.32                            | -             | -         | -           |

<sup>†</sup>*p*<0.05 compared to virgin *Ctsk<sup>fl/fl</sup>*, Two-way ANOVA followed by Fisher's PLSD

<sup>‡</sup>*p*<0.05 compared to virgin *Ctsk<sup>Ocy</sup>*

<sup>#</sup>*p*<0.05 compared to lactating *Ctsk<sup>fl/fl</sup>*

Table S6. Q-RT-PCR.

| Gene             | Virgin                      |                           | Lactating                   |                           | Two-way ANOVA |           |             |
|------------------|-----------------------------|---------------------------|-----------------------------|---------------------------|---------------|-----------|-------------|
|                  | <i>Ctsk<sup>fl/fl</sup></i> | <i>Ctsk<sup>Ocy</sup></i> | <i>Ctsk<sup>fl/fl</sup></i> | <i>Ctsk<sup>Ocy</sup></i> | Deletion      | Lactation | Interaction |
|                  | (n=4-6)                     | (n=3-8)                   | (n=4-6)                     | (n=3-6)                   |               |           |             |
| <i>Rankl</i>     | 1.09±0.17                   | 4.6±0.49 <sup>†</sup>     | 6.2±0.51 <sup>†</sup>       | 4.0±0.9 <sup>†#</sup>     | NS            | 0.0011    | 0.0001      |
| <i>Opg</i>       | 1.05±0.19                   | 2.23±0.63 <sup>†</sup>    | 0.81±0.1 <sup>‡</sup>       | 0.82±0.2 <sup>‡</sup>     | NS            | 0.030     | NS          |
| <i>Rankl/Opg</i> | 1.1±0.23                    | 2.85±0.86                 | 8.06±0.81 <sup>†‡</sup>     | 5.27±0.79 <sup>†‡#</sup>  | NS            | <0.0001   | 0.0031      |
| <i>PthrP</i>     | 1.7±0.61                    | 6.52±2.5 <sup>†</sup>     | 11.47±1.8 <sup>†</sup>      | 9.89±1.55 <sup>†</sup>    | NS            | 0.001     | 0.0415      |
| <i>Sost</i>      | 1.06±0.2                    | 0.42±0.35 <sup>†</sup>    | 0.07±0.02 <sup>†</sup>      | 0.06±0.03                 | 0.04          | 0.0002    | NS          |
| <i>Mmp13</i>     | 1±0.06                      | 1.29±0.25                 | 3.1±1.03                    | 6.27±2.9 <sup>†‡</sup>    | NS            | 0.038     | NS          |
| <i>Fgf23</i>     | 1.15±0.28                   | 0.47±0.07 <sup>†</sup>    | 0.25±0.13 <sup>†</sup>      | 0.18±0.05 <sup>†</sup>    | NS            | 0.007     | NS          |
| <i>Ctsk</i>      | 1.1±0.19                    | 0.61±0.06                 | 4.3±1.53 <sup>†‡</sup>      | 1.8±0.64 <sup>#</sup>     | 0.022         | 0.0024    | NS          |

<sup>†</sup>*p*<0.05 compared to virgin *Ctsk<sup>fl/fl</sup>*, Two-way ANOVA followed by Fisher's PLSD

<sup>‡</sup>*p*<0.05 compared to virgin *Ctsk<sup>Ocy</sup>*

<sup>#</sup>*p*<0.05 compared to lactating *Ctsk<sup>fl/fl</sup>*



Table S7. Three-point bending analysis of virgin and lactating *Ctsk<sup>Ocy</sup>* mice and their control littermates

| Parameters                             | Virgin                      |                           | Lactating                   |                           | Two-way ANOVA |           |             |
|----------------------------------------|-----------------------------|---------------------------|-----------------------------|---------------------------|---------------|-----------|-------------|
|                                        | <i>Ctsk<sup>fl/fl</sup></i> | <i>Ctsk<sup>Ocy</sup></i> | <i>Ctsk<sup>fl/fl</sup></i> | <i>Ctsk<sup>Ocy</sup></i> | Deletion      | Lactation | Interaction |
|                                        | (n=7)                       | (n=6-7)                   | (n=7)                       | (n=7)                     |               |           |             |
| pMOI (mm <sup>4</sup> )                | 0.42±0.01                   | 0.42±0.01                 | 0.36±0.02 <sup>†‡</sup>     | 0.41±0.02                 | NS            | 0.0333    | NS          |
| I <sub>min</sub> (mm <sup>4</sup> )    | 0.149±0.004                 | 0.146±0.004               | 0.128±0.007 <sup>†‡</sup>   | 0.139±0.005               | NS            | 0.0127    | NS          |
| Max bending moment (N)                 | 14.57±0.68                  | 13.78±0.30                | 9.67±0.39 <sup>†‡</sup>     | 11.61±0.46 <sup>†‡#</sup> | NS            | 0         | 0.0089      |
| Failure moment (N-mm)                  | 36.42±1.71                  | 34.45±0.75                | 24.18±0.97 <sup>†‡</sup>    | 29.04±1.56 <sup>†‡#</sup> | NS            | 0         | 0.0089      |
| Yield load (N)                         | 12.61±1.00                  | 10.31±0.45 <sup>†</sup>   | 8.00±0.41 <sup>†</sup>      | 9.01±0.93                 | NS            | 0.0006    | 0.0359      |
| Post yield deformation (mm)            | 0.49±0.11                   | 0.68±0.15                 | 0.67±0.13                   | 0.77±0.12                 | NS            | NS        | NS          |
| Bending stiffness (N-mm <sup>2</sup> ) | 1351±91                     | 1331±57                   | 945±52 <sup>†‡</sup>        | 1100±49 <sup>†</sup>      | NS            | 0.0001    | NS          |
| Estimated modulus (GPa)                | 9.05±0.43                   | 9.15±0.47                 | 7.45±0.42 <sup>†</sup>      | 7.97±0.45 <sup>‡</sup>    | NS            | 0.0044    | NS          |
| Fracture energy (mJ)                   | 7.05±0.90                   | 8.62±1.38                 | 6.13±0.73                   | 8.00±0.62                 | NS            | NS        | NS          |
| Estimated strength (MPa)               | 168±5                       | 161±1                     | 131±4 <sup>†‡</sup>         | 141±5 <sup>†‡</sup>       | NS            | 0         | 0.0450      |

<sup>†</sup>*p*<0.05 compared to virgin *Ctsk<sup>fl/fl</sup>*, Two-way ANOVA followed by Fisher's PLSD

<sup>‡</sup>*p*<0.05 compared to virgin *Ctsk<sup>Ocy</sup>*

<sup>#</sup>*p*<0.05 compared to lactating *Ctsk<sup>fl/fl</sup>*
